# Supplementary material
Source: MDPI journal article supplement (https://www.mdpi.com/2313-4321/9/4/53)
Supplement: s1 [file s1]

## Supporting information for

Qian Zhao <sup>a,b</sup>, Xiaole Wang <sup>a</sup>, Juan Ren <sup>c</sup>, Wei Wang <sup>d</sup>, Jingtao Xu <sup>a</sup>, Shujuan Meng <sup>d</sup>, Jiarou Jin, Xiaochen Li <sup>a</sup>, Yuyang Fu <sup>g</sup>, Kechao Han <sup>h</sup>, Ruijmin Mu <sup>a</sup>, Xinyi Li <sup>a</sup>, Renbo Zhao <sup>a</sup>, Hongbo Wang <sup>a, b\*</sup>, Feiyong Chen <sup>a\*</sup>

a School of Municipal and Environmental Engineering, Institute of Resources and Environmental Innovation, Shandong Jianzhu University, Jinan, 250101, China

b Research Center for Urban Sewage Treatment and Resource Engineering Technology of Shandong Province, Jinan, 250101, China

c Jinan Urban Planning and Design Institute, Jinan, 250001, China

d Shandong Institute of Geological Sciences, Jinan, 250013, Shandong, China

e School of Space and Environment, Beihang University, Beijing, 100191, China

f School of Materials Science and Engineering, Beihang University, Beijing, 100191, China

g School of Water Conservation and Environment, University of Jinan, Jinan, 250022, China

h Jinan Engineering Consulting Institute, Jinan, 250002, China

Figure S1. Diagram of the *Arabidopsis thaliana* hydroponics set-up

Figure S2. The growth status of *Arabidopsis thaliana* at different doses of P sorbent-fertilizer within first 10 days

Figure S3. The growth status of *Arabidopsis thaliana* at different doses of P sorbent-fertilizer during day 10-20

Table S1. Survival rates of *Arabidopsis thaliana* at different doses of P sorbent-fertilizer

Table S2. The released P amount from different masses of P-loaded P-sorbent <sub>D</sub> during first 10 days

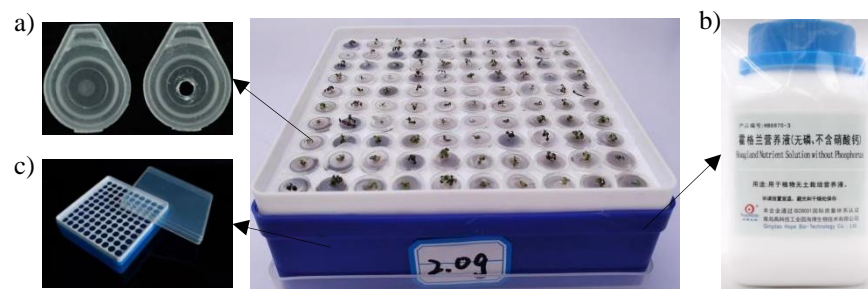

Figure S1. Diagram of the *Arabidopsis thaliana* hydroponics set-up, a) 1.5 ml centrifuge tube cap; b) hydroponic nutrient solution; c) 100-well centrifuge tube cassette

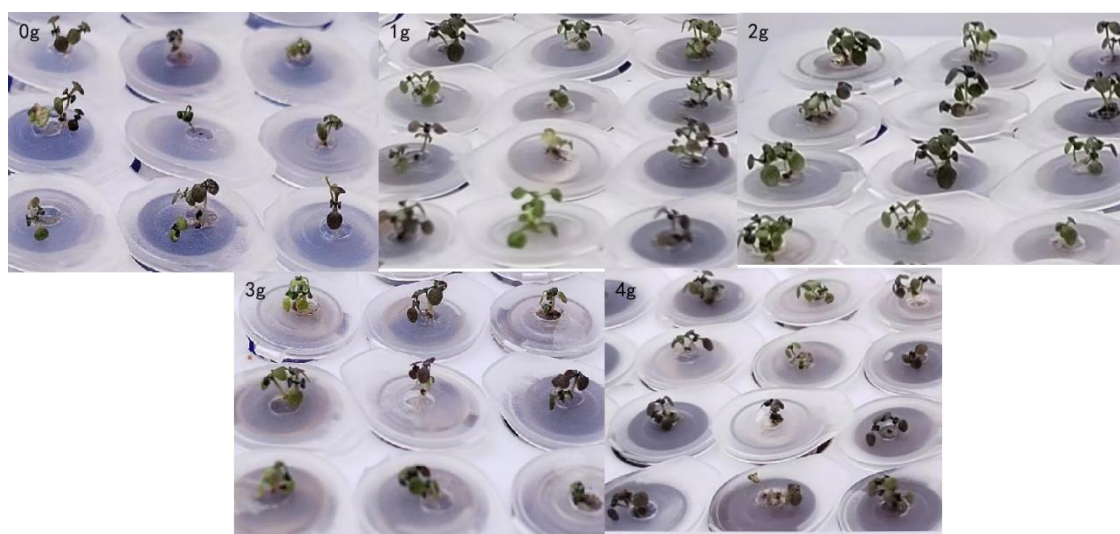

Figure S2. The growth status of *Arabidopsis thaliana* at different doses of P sorbent-fertilizer within first 10 days

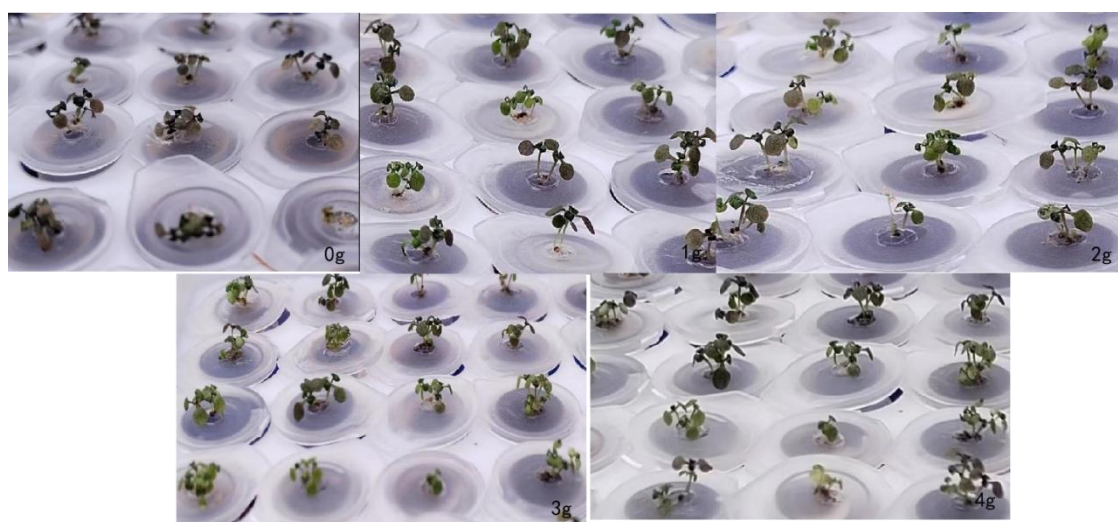

Figure S3. The growth status of *Arabidopsis thaliana* at different doses of P sorbent-fertilizer during day 10-20

Table S1. Survival rates of *Arabidopsis thaliana* at different doses of P sorbent-fertilizer

| Dosage of P sorbent- fertilizer | Survival rates |        |        |
|---------------------------------|----------------|--------|--------|
|                                 | Day 10         | Day 20 | Day 30 |
| 0 g                             | 95%            | 90%    | 90%    |
| 1 g                             | 97.5%          | 95%    | 92.5%  |
| 2 g                             | 100%           | 95%    | 95%    |
| 3 g                             | 97.5%          | 97.5%  | 97.5%  |
| 4 g                             | 90%            | 90%    | 85%    |

Table S2. The released P amount from different masses of P-loaded P-sorbent D during first 10 days

| released P<br>amount<br>(mg/L) | different masses of P-loaded P-sorbent D |      |      |      |
|--------------------------------|------------------------------------------|------|------|------|
|                                | 1g                                       | 2g   | 3g   | 4g   |
| 1d                             | 1.65                                     | 2.89 | 4.24 | 6.17 |
| 2d                             | 1.52                                     | 2.48 | 3.85 | 5.43 |
| 3d                             | 1.25                                     | 2.22 | 3.59 | 5.00 |
| 4d                             | 1.21                                     | 1.83 | 3.17 | 4.86 |
| 5d                             | 0.92                                     | 1.54 | 2.80 | 4.16 |
| 6d                             | 0.38                                     | 1.16 | 2.54 | 3.35 |
| 7d                             | 0.26                                     | 0.71 | 2.08 | 2.87 |
| 8d                             | 0.20                                     | 0.33 | 1.62 | 2.38 |
| 9d                             | 0.11                                     | 0.20 | 0.91 | 1.53 |
| 10d                            | 0.04                                     | 0.10 | 0.47 | 0.80 |
